# Supplementary material for: Synergistic Anti-Inflammatory Activity of Ginger and Turmeric Extracts in Inhibiting Lipopolysaccharide and Interferon-γ-Induced Proinflammatory Mediators
Source: MDPI journal article supplement (doi:10.3390/molecules27123877), 2022-06-16
Supplement: s1 [file s1]

**Table S1. Validation parameters for the method used to quantify ginger and turmeric extracts (n=3 analytical runs).**

| Compounds             | Regression equation | R <sup>2</sup> | Limit of detection (µg/mL) | Limit of quantification (µg/mL) | Precision, Intra-day (n≥3) | RSD% | Precision, RSD% inter-day (n≥3) |
|-----------------------|---------------------|----------------|----------------------------|---------------------------------|----------------------------|------|---------------------------------|
| Zingerol              | Y=81367x +617.45    | 0.99           | 1.59                       | 4.79                            | 0.44                       |      | 3.32                            |
| 6-gingerol            | Y=60921x + 1312     | 0.99           | 0.99                       | 2.97                            | 0.14                       |      | 0.18                            |
| 8-gingerol            | Y= 51224x + 1547.7  | 0.99           | 0.92                       | 2.76                            | 0.19                       |      | 0.28                            |
| 10-gingerol           | Y = 47288x + 1217.4 | 0.99           | 1.59                       | 4.78                            | 0.17                       |      | 0.49                            |
| 6-shogaol             | Y = 79816x + 74.868 | 1.00           | 0.21                       | 0.64                            | 0.16                       |      | 0.85                            |
| 8-shogaol             | Y = 73090x + 73.626 | 1.00           | 0.28                       | 0.85                            | 0.12                       |      | 0.38                            |
| 10-shogaol            | Y = 74753x + 54.276 | 1.00           | 0.19                       | 0.57                            | 0.07                       |      | 0.25                            |
| Curcumin              | Y=67047x – 1803.5   | 0.99           | 8.88                       | 26.67                           | 0.10                       |      | 1.27                            |
| Desmethoxycurcumin    | Y=17556x + 32.161   | 1.00           | 0.23                       | 0.68                            | 0.27                       |      | 0.88                            |
| Bisdesmethoxycurcumin | Y= 43107x + 54.821  | 1.00           | 0.17                       | 0.51                            | 0.22                       |      | 1.04                            |

**Table S2. Content of bioactive compounds in G and T quantified by HPLC-PDA (n>3) and calculated amount in G-T 5:2 extracts (mg/mL).**

| Herbal samples | Compounds | Content in G/T (mg/g) determined by HPLC-PDA | Content in G/T at 50 mg/mL (mg/mL) | Content in G-T 5:2 combination at 50 mg/mL (compounds in ginger x 5/7; compounds in turmeric x 2/7) (mg/mL) |
|----------------|-----------|----------------------------------------------|------------------------------------|-------------------------------------------------------------------------------------------------------------|
| G              | 6-g       | 69.57±0.16                                   | 3.48±0.01                          | 2.48±0.01                                                                                                   |
|                | 8-g       | 10.43±0.23                                   | 0.52±0.01                          | 0.37±0.01                                                                                                   |
|                | 10-g      | 19.62±0.63                                   | 0.98±0.03                          | 0.70±0.02                                                                                                   |
|                | 6-s       | 7.48±0.19                                    | 0.37±0.01                          | 0.27±0.01                                                                                                   |
|                | 8-s       | 1.56±0.03                                    | 0.08±0.00                          | 0.06±0.00                                                                                                   |
|                | 10-s      | 2.30±0.03                                    | 0.12±0.00                          | 0.08±0.00                                                                                                   |
| T              | C         | 751.76±101.45                                | 37.59±5.07                         | 10.74±1.45                                                                                                  |
|                | B         | 14.77±3.63                                   | 0.74±0.18                          | 0.21±0.05                                                                                                   |
|                | D         | 156.15±26.24                                 | 7.81±1.31                          | 2.23±0.09                                                                                                   |

**Table S3. IC<sub>50</sub> and CI values for compounds combination (combined by their content in G-T 5:2) in inhibiting NO on RAW 264.7 cells.**

| Individual compounds | NO assay                 | Compounds combination by their content in GT52 | NO assay                 |                        |
|----------------------|--------------------------|------------------------------------------------|--------------------------|------------------------|
|                      | IC <sub>50</sub> (μg/mL) |                                                | IC <sub>50</sub> (μg/mL) | CI at IC <sub>50</sub> |
| 6g                   | NA*                      | 6g – 6s                                        | 91.24±8.50#              | 6.68                   |
| 8g                   | NA                       | 6g - 8s                                        | 198.84±10.97#            | 3.19                   |
| 10g                  | NA                       | 6g – 10s                                       | 126.99±7.91#             | 4.69                   |
| 6s                   | 2.90±1.22                | 8g – 6s                                        | 8.47±0.70                | 2.85                   |
| 8s                   | 1.96±1.50                | 8g – 8s                                        | 84.05±4.18               | 10.69                  |
| 10s                  | 3.69±0.86                | 8g – 10s                                       | 59.73#                   | 14.26                  |
| B                    | 16.14±1.68               | 10g – 6s                                       | 22.06#                   | 5.81                   |
| C                    | 5.87±0.12                | 10g – 8s                                       | 1174.99#                 | 146.35                 |
| D                    | 8.30±1.78                | 10g – 10s                                      | 24.52#                   | 4.64                   |
|                      |                          | 6g - B                                         | 43.93±0.67               | 2.14                   |
|                      |                          | 6g - C                                         | 16.06±2.41               | 5.23                   |
|                      |                          | 6g - D                                         | 9.44±1.42                | 3.69                   |
|                      |                          | 8g - B                                         | 27.33±3.75               | 6.28                   |
|                      |                          | 8g - C                                         | 12.31±4.41               | 4.48                   |
|                      |                          | 8g - D                                         | 4.89±1.07                | 2.48                   |
|                      |                          | 10g - B                                        | 17.34±5.38               | 3.35                   |
|                      |                          | 10g - C                                        | 10.02±5.28               | 3.58                   |
|                      |                          | 10g - D                                        | 11.86±2.86               | 5.82                   |
|                      |                          | 6s- B                                          | 12.70±2.09               | 1.67                   |
|                      |                          | 6s - C                                         | 16.06±1.12               | 6.19                   |
|                      |                          | 6s - D                                         | 9.06±1.16                | 4.90                   |
|                      |                          | 8s- B                                          | 12.61±1.64               | 59.19                  |

|  |  |         |            |       |
|--|--|---------|------------|-------|
|  |  | 8s - C  | 13.19±1.91 | 4.98  |
|  |  | 8s - D  | 6.33±0.81  | 3.38  |
|  |  | 10s - B | 40.32±2.50 | 25.72 |
|  |  | 10s - C | 10.02±1.95 | 3.82  |
|  |  | 10s - D | 9.68±0.92  | 5.23  |

\*NA: not available; # IC<sub>50</sub> values were estimated from the measured dose-response curves but not derived from the measured data. STD not available.

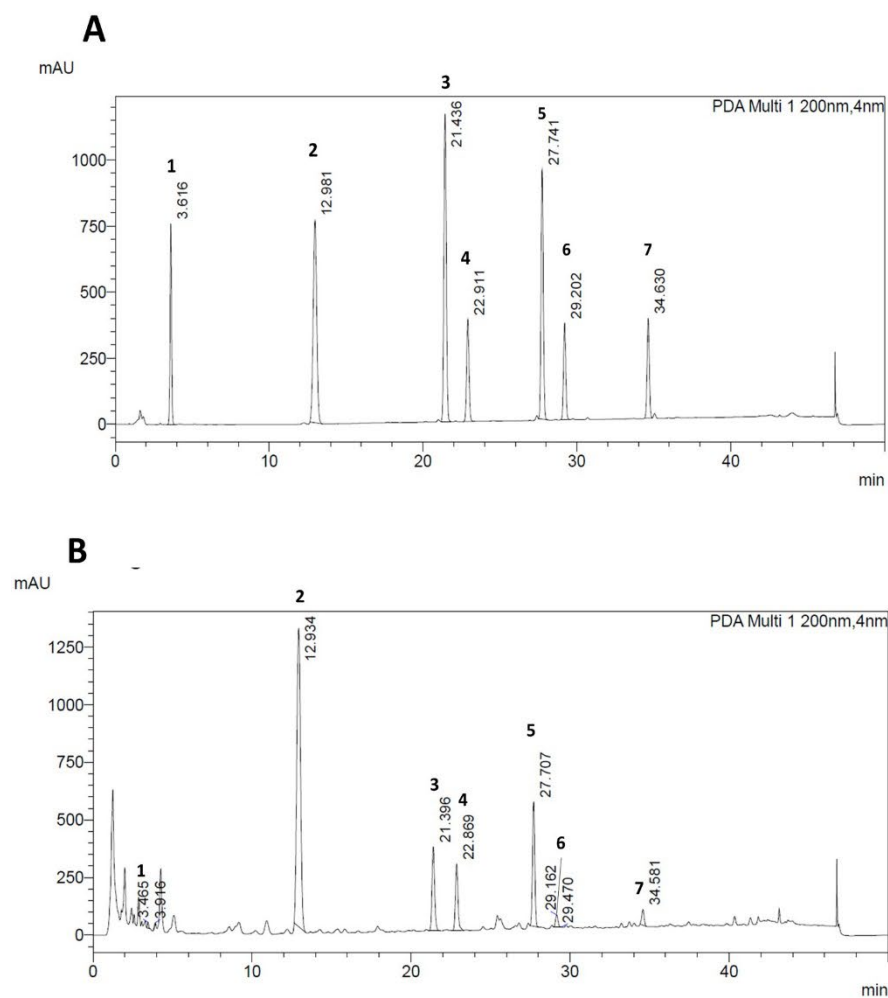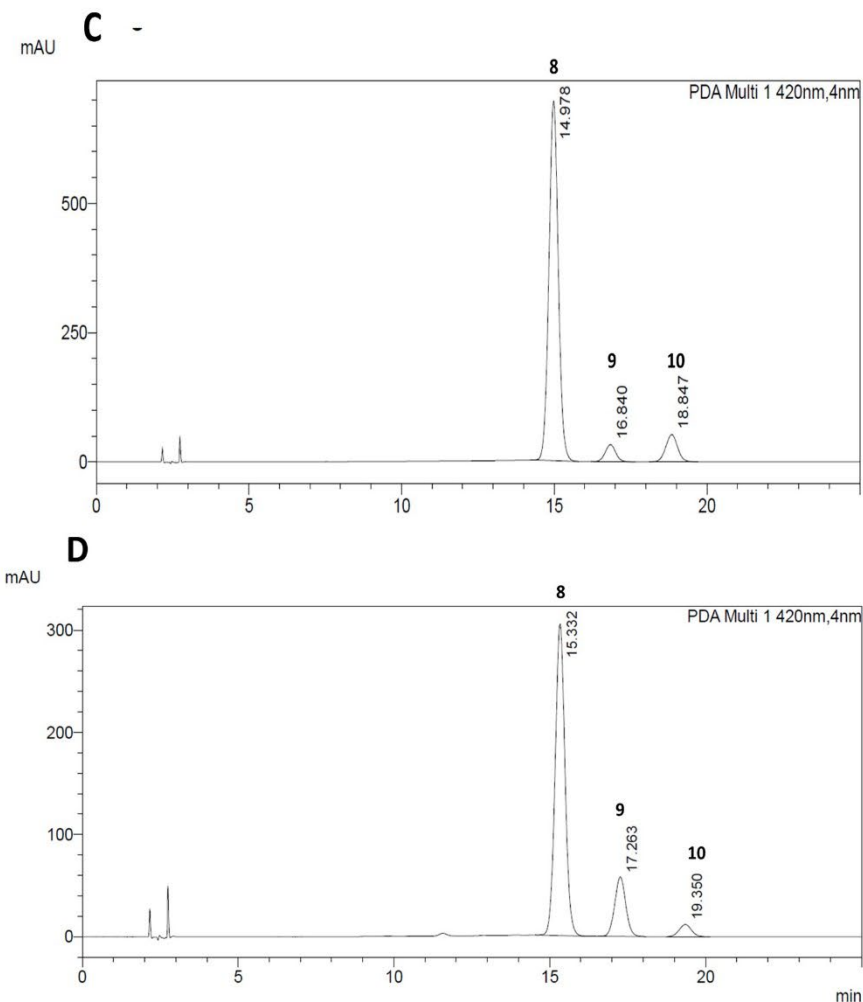

**Figure S1. HPLC chromatograms of mixed standards and extracts of ginger (A-B) and turmeric (C-D). 1. Zingerol, 2. 6-gingerol, 3. 8-gingerol, 4. 6-shogaol, 5. 10-gingerol, 6. 8-shogaol, 7. 10-shogaol. 8. curcumin, 9. demethoxycurcumin, 10. bisdemethoxycurcumin.**

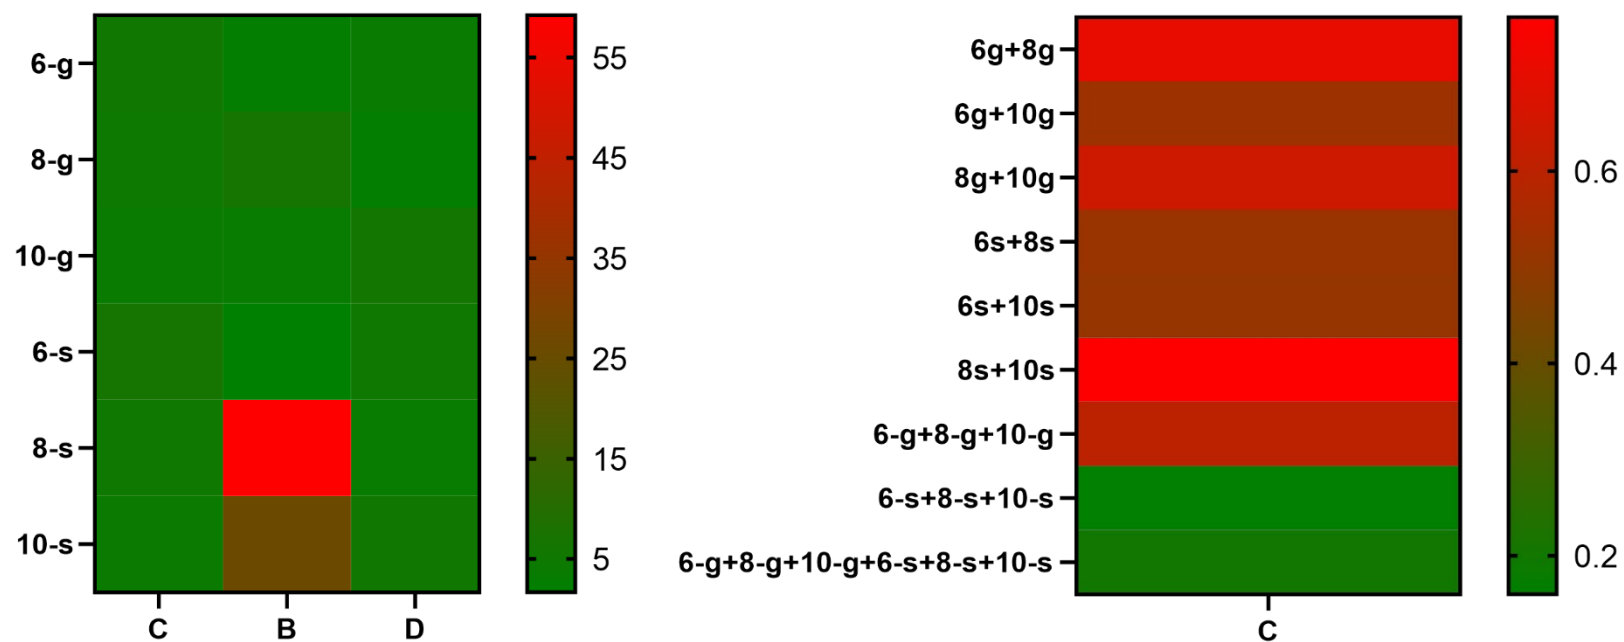

Figure S2. Heatmaps of interaction among tested compounds measured by CI values at IC<sub>50</sub>. CI>1 refers to antagonism, and CI<1 refers to synergy.
